# Supplementary material for: Increased Overall Heart Rate Irregularity Risk by Hyperuricemia in the General Population: Results from the Korean National Health and Nutrition Examination Survey
Source: PubMed Central journal article supplement (PMC7600340; doi:10.3390/medicina56100501), 2020-09-24
Supplement: medicina-56-00501-s001.pdf [file medicina-56-00501-s001.pdf]

## Information S1. Measurement of heart rate in the Korean National Health and Nutrition Examination Survey.

### 1) *Eligible and excluded subjects*

Pulse of all subjects aged 10 years or older are measured. However, subjects with rashes, open wounds, weakness, splints, edema, hematomas, and arteriovenous fistula for dialysis are excluded from the measurement. Female subjects underwent axillary node biopsy or surgery, or one radical mastectomy, measured on the opposite arm. Female subjects who underwent both radical mastectomies are excluded from the measurement.

### 2) *Preparation before pulse measurement*

#### A. Sitting posture

Sit back against the back of the chair so that the subject's spine is in a straight line and help them sit stably and comfortably. Do not cross the legs and keep their feet flat on the floor. If their feet do not touch the floor, use a footrest.

#### B. Measuring arm selection

In principle, right arm measurement is used for standardization. However, if measurement is not possible on the right arm, the measurement is made on the left arm.

#### C. Precautions before measurement

To measure the pulse in a stable state, the subject must have a 5-minute rest period while sitting in a chair before measurement. Words, conversations, and movements can affect the measurement, so avoid them until the measurement is finished. After the 5-minute rest period, the pulse rate is measured.

### 3) *Measurement of pulse rate*

With the sleeve of the measuring arm fully rolled up, palms face up and the elbows are supported with armrests to keep slightly bent.

Measure and record the right radial pulse for 15 seconds. If the pulse is irregular or bradycardia (<15 beats for 15 seconds) or tachycardia (>26 beats for 15 seconds), check the pulse rate for 60 seconds and check whether it is regular and record it.

**Table S1.** Characteristics of male participants in the study.

|                                               | Total<br>(n=4756)   | Non-hyperuricemic<br>(n=3847) | Hyperuricemic<br>(n=909) | <i>p</i> | Regular HR<br>(n = 4672) | Irregular HR<br>(n = 84) | <i>p</i> |
|-----------------------------------------------|---------------------|-------------------------------|--------------------------|----------|--------------------------|--------------------------|----------|
| Age, years                                    | 45.7 ± 0.3          | 46.7 ± 0.4                    | 41.8 ± 0.6               | <0.0001  | 45.5 ± 0.3               | 62.5 ± 2.3               | <0.0001  |
| Urban residence                               | 85.1 (1.7)          | 84.5 (1.8)                    | 87.2 (1.9)               | 0.0947   | 85.0 (1.7)               | 88.3 (3.7)               | 0.4077   |
| Occupation                                    | 76.2 (0.8)          | 76.1 (0.9)                    | 76.4 (1.8)               | 0.8907   | 76.4 (0.9)               | 60.3 (6.3)               | 0.0042   |
| Income (lowest quartile)                      | 13.7 (0.8)          | 14.1 (0.8)                    | 12.0 (1.4)               | 0.1598   | 13.5 (0.8)               | 22.2 (4.6)               | 0.0238   |
| Low education level <sup>a</sup>              | 17.8 (0.8)          | 18.8 (0.9)                    | 14.2 (1.2)               | 0.0014   | 17.5 (0.8)               | 46.6 (6.2)               | <0.0001  |
| Smoking                                       |                     |                               |                          | 0.1222   |                          |                          | <0.0001  |
| Never                                         | 28.9 (0.8)          | 28.4 (0.9)                    | 30.9 (1.9)               |          | 29.0 (0.9)               | 17.0 (4.2)               |          |
| Former                                        | 33.4 (0.8)          | 34.2 (0.9)                    | 30.3 (1.8)               |          | 33.1 (0.8)               | 61.0 (6.7)               |          |
| Current                                       | 37.8 (1.0)          | 37.5 (1.0)                    | 38.9 (1.9)               |          | 37.9 (1.0)               | 22.1 (6.2)               |          |
| Alcohol consumption                           |                     |                               |                          | 0.0003   |                          |                          | 0.1317   |
| None                                          | 13.8 (0.6)          | 14.6 (0.7)                    | 10.8 (1.1)               |          | 13.7 (0.6)               | 21.4 (4.8)               |          |
| <30 g/day                                     | 70.4 (0.8)          | 70.7 (0.9)                    | 69.1 (1.7)               |          | 70.4 (0.8)               | 68.1 (6.1)               |          |
| ≥30 g/day                                     | 15.8 (0.6)          | 14.8 (0.7)                    | 20.0 (1.6)               |          | 15.9 (0.6)               | 10.5 (3.8)               |          |
| Physical activity <sup>b</sup>                | 50.7 (1.0)          | 50.0 (1.1)                    | 53.7 (2.0)               | 0.0883   | 50.7 (1.0)               | 51.8 (6.6)               | 0.8786   |
| BMI, kg/m <sup>2</sup>                        | 24.6 ± 0.1          | 24.2 ± 0.1                    | 25.9 ± 0.1               | <0.0001  | 24.6 ± 0.1               | 23.9 ± 0.4               | 0.0721   |
| WC, cm                                        | 86.1 ± 0.2          | 85.3 ± 0.2                    | 89.1 ± 0.4               | <0.0001  | 86.1 ± 0.2               | 85.8 ± 1.1               | 0.8080   |
| HR, per minute                                | 57.1 ± 0.7          | 56.3 ± 0.7                    | 60.6 ± 2.5               | 0.0968   | 55.4 ± 0.8               | 68.4 ± 1.9               | <0.0001  |
| HR irregularity                               | 1.2 (0.2)           | 1.0 (0.1)                     | 2.0 (0.5)                | 0.0140   |                          |                          |          |
| Systolic BP, mmHg                             | 120.0 ± 0.3         | 119.5 ± 0.3                   | 122.2 ± 0.5              | <0.0001  | 120.0 ± 0.3              | 121.1 ± 2.2              | 0.5919   |
| Diastolic BP, mmHg                            | 78.5 ± 0.2          | 77.9 ± 0.2                    | 80.8 ± 0.4               | <0.0001  | 78.6 ± 0.2               | 72.4 ± 1.2               | <0.0001  |
| Fasting glucose, mg/dL                        | 101.8 ± 0.5         | 102.4 ± 0.5                   | 122.2 ± 0.5              | <0.0001  | 101.8 ± 0.5              | 104.5 ± 2.3              | 0.2447   |
| Total C, mg/dL                                | 192.4 ± 0.7         | 190.2 ± 0.7                   | 201.0 ± 1.7              | <0.0001  | 192.6 ± 0.7              | 175.9 ± 4.7              | 0.0004   |
| TG <sup>c</sup> , mg/dL                       | 131.7 (128.8-134.6) | 124.4 (121.7-127.2)           | 164.7 (155.8-174.1)      | <0.0001  | 132.0 (129.1-134.9)      | 111.2 (96.7-127.9)       | 0.0172   |
| eGFR <sup>d</sup> , mL/min/1.73m <sup>2</sup> | 93.9 ± 0.4          | 95.0 ± 0.4                    | 89.7 ± 0.6               | <0.0001  | 94.1 ± 0.4               | 83.5 ± 2.4               | <0.0001  |
| Uric acid, mg/dL                              | 5.90 ± 0.03         | 5.42 ± 0.02                   | 7.81 ± 0.03              | <0.0001  | 5.90 ± 0.03              | 6.25 ± 0.23              | 0.1229   |
| hs-CRP, mg/dL                                 | 1.29 ± 0.03         | 1.24 ± 0.04                   | 1.47 ± 0.07              | 0.0058   | 1.28 ± 0.03              | 2.04 ± 0.52              | 0.1476   |
| Hyperuricemia <sup>e</sup>                    | 20.2 (0.7)          |                               |                          |          | 20.1 (0.7)               | 34.0 (6.7)               | 0.0140   |

|                                |            |            |            |        |            |            |        |
|--------------------------------|------------|------------|------------|--------|------------|------------|--------|
| Hypertension <sup>f</sup>      | 30.9 (0.8) | 29.5 (0.9) | 36.4 (1.9) | 0.0007 | 30.6 (0.8) | 54.2 (6.7) | 0.0002 |
| Diabetes mellitus <sup>g</sup> | 11.4 (0.5) | 12.4 (0.6) | 7.8 (0.9)  | 0.0002 | 11.3 (0.5) | 21.9 (4.9) | 0.0054 |
| Hyperlipidemia <sup>h</sup>    | 8.4 (0.5)  | 8.9 (0.5)  | 6.2 (0.9)  | 0.0181 | 8.4 (0.5)  | 9.3 (3.1)  | 0.7596 |

Data are presented as weighted mean  $\pm$  standard error (SE) or weighted percentage (SE). <sup>a</sup> Low education level means middle school graduate or less. <sup>b</sup> Physical activity is defined in accordance with the WHO recommendations, which refers to more than 150 minutes of moderate-intensity aerobic physical activity throughout the week, or more than 75 minutes of vigorous-intensity aerobic physical activity throughout the week, or an equivalent combination of moderate- and vigorous-intensity activity. <sup>c</sup> TG values are presented as a geometric mean (95% confidence interval). <sup>d</sup> An eGFR calculated from serum creatinine using an isotope dilution mass spectrometry (IDMS) traceable Modification of Diet in Renal Disease (MDRD) Study equation. <sup>e</sup> Hyperuricemia is defined as a serum uric acid level of  $\geq 7.0$  mg/dL for men. <sup>f</sup> Hypertension is defined as a systolic BP  $>140$  mmHg, or a diastolic BP  $>90$  mmHg, or taking antihypertensive medication. <sup>g</sup> Diabetes mellitus is defined as a fasting blood glucose level  $>126$  mg/dL, or previous history of diagnosis by a doctor, or taking hypoglycemic agent or insulin. <sup>h</sup> Hyperlipidemia is defined as a fasting total C  $\geq 240$  mg/dL or taking a lipid lowering agent. Abbreviations: HR, heart rate; BMI, body mass index; WC, waist circumference; BP, blood pressure; C, cholesterol; TG, triglyceride; eGFR, estimated glomerular filtration rate; hs-CRP, high-sensitivity C-reactive protein.

**Table S2.** Characteristics of female participants in the study.

|                                               | Total<br>(n=6071) | Non-hyperuricemic<br>(n=5672) | Hyperuricemic<br>(n=399) | <i>p</i> | Regular HR<br>(n=6025) | Irregular HR<br>(n=46) | <i>p</i> |
|-----------------------------------------------|-------------------|-------------------------------|--------------------------|----------|------------------------|------------------------|----------|
| Age, years                                    | 47.6 ± 0.3        | 47.2 ± 0.3                    | 52.8 ± 1.2               | <0.0001  | 47.5 ± 0.3             | 61.7 ± 3.1             | <0.0001  |
| Urban residence                               | 85.2 (1.7)        | 85.4 (1.7)                    | 81.4 (2.9)               | 0.0497   | 85.2 (1.7)             | 88.7 (4.5)             | 0.4783   |
| Occupation                                    | 53.4 (0.9)        | 54.4 (0.9)                    | 38.0 (2.8)               | <0.0001  | 53.5 (0.9)             | 37.9 (8.6)             | 0.0791   |
| Income (lowest quartile)                      | 16.6 (0.8)        | 16.0 (0.8)                    | 25.8 (2.5)               | <0.0001  | 16.5 (0.8)             | 27.6 (7.0)             | 0.0582   |
| Low education level <sup>a</sup>              | 28.2 (0.9)        | 27.6 (0.9)                    | 37.3 (3.0)               | 0.0003   | 28.1 (0.9)             | 41.3 (7.2)             | 0.0422   |
| Smoking                                       |                   |                               |                          | 0.0038   |                        |                        | 0.6395   |
| Never                                         | 89.9 (0.5)        | 90.2 (0.5)                    | 85.6 (2.0)               |          | 90.0 (0.5)             | 88.2 (5.3)             |          |
| Former                                        | 4.7 (0.3)         | 4.7 (0.4)                     | 4.8 (1.2)                |          | 4.7 (0.3)              | 7.7 (4.4)              |          |
| Current                                       | 5.4 (0.4)         | 5.1 (0.4)                     | 9.6 (1.8)                |          | 5.4 (0.4)              | 4.1 (3.1)              |          |
| Alcohol consumption                           |                   |                               |                          | 0.1252   |                        |                        | N/A      |
| None                                          | 30.5 (0.8)        | 30.3 (0.8)                    | 32.4 (2.7)               |          | 30.4 (0.7)             | 44.2 (8.9)             |          |
| <30 g/day                                     | 66.9 (0.8)        | 67.2 (0.8)                    | 63.3 (2.8)               |          | 67.0 (0.8)             | 55.9 (8.9)             |          |
| ≥30 g/day                                     | 2.6 (0.3)         | 2.5 (0.3)                     | 4.3 (1.3)                |          | 2.7 (0.3)              | N/A                    |          |
| Physical activity <sup>b</sup>                | 44.5 (0.9)        | 44.4 (0.9)                    | 45.2 (2.9)               | 0.7936   | 44.6 (0.9)             | 33.8 (9.3)             | 0.2702   |
| BMI, kg/m <sup>2</sup>                        | 23.3 ± 0.1        | 23.1 ± 0.1                    | 26.0 ± 0.3               | <0.0001  | 23.3 ± 0.1             | 23.5 ± 0.6             | 0.7544   |
| WC, cm                                        | 78.4 ± 0.2        | 77.9 ± 0.2                    | 85.9 ± 0.7               | <0.0001  | 78.4 ± 0.2             | 81.3 ± 1.5             | 0.0480   |
| HR, per minute                                | 58.5 ± 0.9        | 58.6 ± 1.0                    | 57.3 ± 3.1               | 0.6941   | 56.8 ± 0.9             | 68.7 ± 2.1             | <0.0001  |
| HR irregularity                               | 0.7 (0.1)         | 0.6 (0.1)                     | 2.5 (1.1)                | 0.0011   |                        |                        |          |
| Systolic BP, mmHg                             | 115.0 ± 0.3       | 114.6 ± 0.3                   | 120.3 ± 1.1              | <0.0001  | 114.9 ± 0.3            | 123.7 ± 2.3            | 0.0002   |
| Diastolic BP, mmHg                            | 73.4 ± 0.2        | 73.3 ± 0.2                    | 75.1 ± 0.6               | 0.0060   | 73.4 ± 0.2             | 73.9 ± 1.8             | <0.7677  |
| Fasting glucose, mg/dL                        | 97.2 ± 0.4        | 96.8 ± 0.4                    | 103.2 ± 1.4              | <0.0001  | 97.1 ± 0.4             | 111.8 ± 7.5            | 0.0501   |
| Total C, mg/dL                                | 194.6 ± 0.6       | 194.1 ± 0.6                   | 202.3 ± 2.2              | 0.0002   | 194.6 ± 0.6            | 188.3 ± 6.0            | 0.2935   |
| TG <sup>c</sup> , mg/dL                       | 95.9 (94.1-97.7)  | 94.0 (92.2-95.8)              | 129.7 (121.2-138.9)      | <0.0001  | 95.8 (94.0-97.7)       | 107.4 (91.8-125.7)     | 0.1559   |
| eGFR <sup>d</sup> , mL/min/1.73m <sup>2</sup> | 99.0 ± 0.4        | 100.0 ± 0.4                   | 83.8 ± 1.6               | <0.0001  | 99.2 ± 0.4             | 82.6 ± 4.9             | 0.0007   |
| Uric acid, mg/dL                              | 4.37 ± 0.02       | 4.22 ± 0.01                   | 6.65 ± 0.04              | <0.0001  | 4.37 ± 0.02            | 4.66 ± 0.26            | 0.2595   |
| hs-CRP, mg/dL                                 | 1.07 ± 0.02       | 1.02 ± 0.02                   | 1.80 ± 0.13              | <0.0001  | 1.06 ± 0.02            | 1.17 ± 0.22            | 0.6202   |
| Hyperuricemia <sup>e</sup>                    | 6.2 (0.4)         |                               |                          |          | 6.1 (0.4)              | 21.9 (8.5)             | 0.0011   |
| Hypertension <sup>f</sup>                     | 22.9 (0.8)        | 21.4 (0.7)                    | 44.9 (3.1)               | <0.0001  | 22.7 (0.8)             | 46.6 (8.6)             | 0.0011   |

|                                |            |            |            |         |            |            |        |
|--------------------------------|------------|------------|------------|---------|------------|------------|--------|
| Diabetes mellitus <sup>g</sup> | 9.3 (0.5)  | 8.6 (0.5)  | 19.6 (2.4) | <0.0001 | 9.2 (0.5)  | 22.5 (6.8) | 0.0048 |
| Hyperlipidemia <sup>h</sup>    | 10.8 (0.5) | 10.6 (0.5) | 14.5 (2.0) | 0.0299  | 10.7 (0.5) | 25.6 (7.3) | 0.0043 |

Data are presented as weighted mean  $\pm$  standard error (SE) or weighted percentage (SE). <sup>a</sup> Low education level means middle school graduate or less. <sup>b</sup> Physical activity is defined in accordance with the WHO recommendations, which refers to more than 150 minutes of moderate-intensity aerobic physical activity throughout the week, or more than 75 minutes of vigorous-intensity aerobic physical activity throughout the week, or an equivalent combination of moderate- and vigorous-intensity activity. <sup>c</sup> TG values are presented as a geometric mean (95% confidence interval). <sup>d</sup> An eGFR calculated from serum creatinine using an isotope dilution mass spectrometry (IDMS) traceable Modification of Diet in Renal Disease (MDRD) Study equation. <sup>e</sup> Hyperuricemia is defined as a serum uric acid level of  $\geq 7.0$  mg/dL for men. <sup>f</sup> Hypertension is defined as a systolic BP  $>140$  mmHg, or a diastolic BP  $>90$  mmHg, or taking antihypertensive medication. <sup>g</sup> Diabetes mellitus is defined as a fasting blood glucose level  $>126$  mg/dL, or previous history of diagnosis by a doctor, or taking hypoglycemic agent or insulin. <sup>h</sup> Hyperlipidemia is defined as a fasting total C  $\geq 240$  mg/dL or taking a lipid lowering agent. Abbreviations: HR, heart rate; BMI, body mass index; WC, waist circumference; BP, blood pressure; C, cholesterol; TG, triglyceride; eGFR, estimated glomerular filtration rate; hs-CRP, high-sensitivity C-reactive protein; N/A, not applicable.

1 **Table S3.** Multivariate regression analyses for association between hyperuricemia and heart rate irregularity in  
 2 male population.

|                                      | Prevalence<br>% (SE) | OR (95% CI)         |                     |                     |                     |
|--------------------------------------|----------------------|---------------------|---------------------|---------------------|---------------------|
|                                      |                      | Model 1             | Model 2             | Model 3             | Model 4             |
| Uric acid, continuous<br>(per mg/dL) |                      | 1.22<br>(0.96-1.54) | 1.34<br>(1.11-1.62) | 1.35<br>(1.10-1.65) | 1.38<br>(1.11-1.72) |
| <i>p</i>                             |                      | 0.1029              | 0.0028              | 0.0037              | 0.0038              |
| Hyperuricemia                        |                      |                     |                     |                     |                     |
| No                                   | 0.99 (0.14)          | 1.00 (ref.)         | 1.00 (ref.)         | 1.00 (ref.)         | 1.00 (ref.)         |
| Yes                                  | 2.02 (0.51)          | 2.05<br>(1.14-3.69) | 2.87<br>(1.61-5.12) | 2.91<br>(1.55-5.46) | 3.04<br>(1.61-5.74) |
| <i>p</i>                             | 0.0140               | 0.0165              | 0.0004              | 0.0010              | 0.0007              |

3 Model 1 is a non-adjusted model. Model 2 is adjusted for age. Model 3 is adjusted for model 2 + body mass  
 4 index, smoking, drinking, hypertension, and diabetes mellitus. Model 4 is adjusted for model 3 + cardiovascular  
 5 disease.

6

7 **Table S4.** Multivariate regression analyses for association between hyperuricemia and heart rate  
 8 irregularity in female population.

|                                      | Prevalence<br>% (SE) | OR (95% CI)          |                     |                     |                     |
|--------------------------------------|----------------------|----------------------|---------------------|---------------------|---------------------|
|                                      |                      | Model 1              | Model 2             | Model 3             | Model 4             |
| Uric acid, continuous<br>(per mg/dL) |                      | 1.31<br>(0.86-2.00)  | 1.18<br>(0.81-1.73) | 1.21<br>(0.83-1.78) | 1.06<br>(0.74-1.51) |
| <i>p</i>                             |                      | 0.2068               | 0.3927              | 0.3187              | 0.7584              |
| Hyperuricemia                        |                      |                      |                     |                     |                     |
| No                                   | 0.59 (0.12)          | 1.00 (ref.)          | 1.00 (ref.)         | 1.00 (ref.)         | 1.00 (ref.)         |
| Yes                                  | 2.51 (1.09)          | 4.33<br>(1.64-11.43) | 3.09<br>(1.16-8.27) | 3.40<br>(1.18-9.84) | 2.50<br>(0.80-7.77) |
| <i>p</i>                             | 0.0011               | 0.0032               | 0.0243              | 0.0240              | 0.1129              |

9 Model 1 is a non-adjusted model. Model 2 is adjusted for age. Model 3 is adjusted for model 2 + body  
 10 mass index, smoking, drinking, hypertension, and diabetes mellitus. Model 4 is adjusted for model 3  
 11 + cardiovascular disease.  
 12

13 **Table S5.** Odds ratio for heart rate irregularity according to uric acid level.

|                    | Prevalence<br>% (SE) | OR (95% CI)          |                      |                      |                      |
|--------------------|----------------------|----------------------|----------------------|----------------------|----------------------|
|                    |                      | Model 1              | Model 2              | Model 3              | Model 4              |
| Uric acid level    |                      |                      |                      |                      |                      |
| <3 mg/dL           | 0.50 (0.37)          | 1.00 (ref.)          | 1.00 (ref.)          | 1.00 (ref.)          | 1.00 (ref.)          |
| 3-6 mg/dL          | 0.76 (0.10)          | 1.52<br>(0.35-6.61)  | 1.43<br>(0.33-6.24)  | 1.58<br>(0.36-6.97)  | 1.59<br>(0.36-7.04)  |
| 6-9 mg/dL          | 1.47 (0.25)          | 2.95<br>(0.66-13.21) | 2.80<br>(0.60-13.02) | 3.27<br>(0.67-16.05) | 3.31<br>(0.68-16.27) |
| >9 mg/dL           | 3.34 (2.01)          | 6.83<br>(1.03-45.32) | 6.25<br>(0.92-42.38) | 6.24<br>(0.79-49.51) | 7.24<br>(1.03-51.08) |
| <i>p</i> for trend | 0.0011               | 0.0005               | 0.0022               | 0.0017               | 0.0019               |

14 Model 1 is a non-adjusted model. Model 2 is adjusted for age and sex. Model 3 is adjusted for model 2 + body  
 15 mass index, smoking, drinking, hypertension, and diabetes mellitus. Model 4 is adjusted for model 3 +  
 16 cardiovascular disease.
